# Supplementary material
Source: PubMed Central journal article supplement (PMC60859)

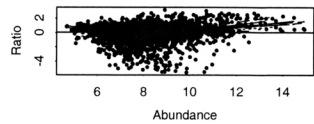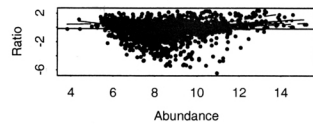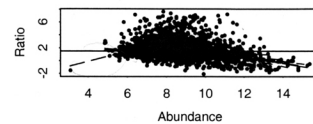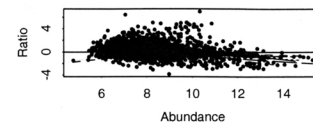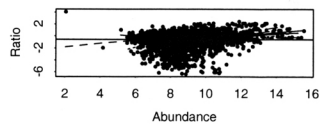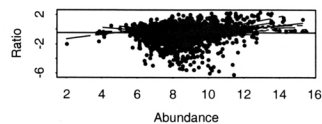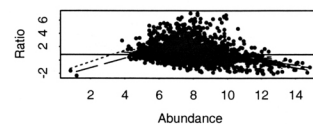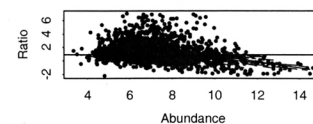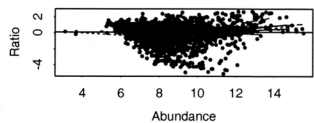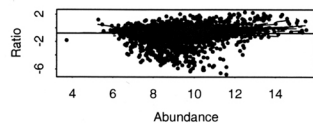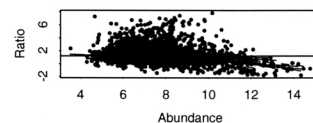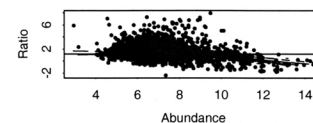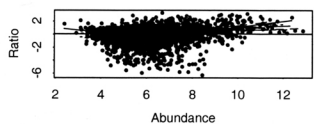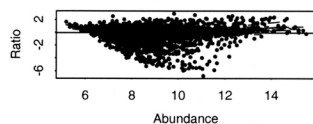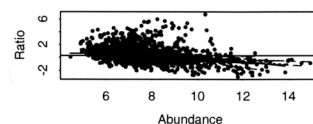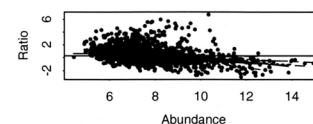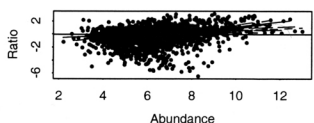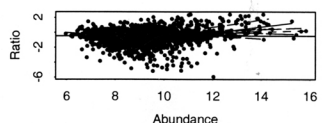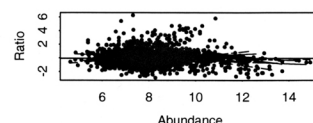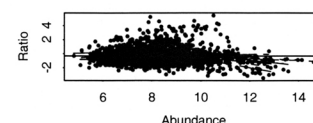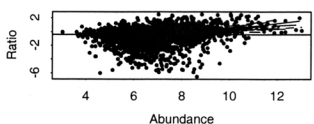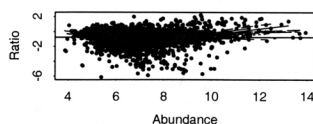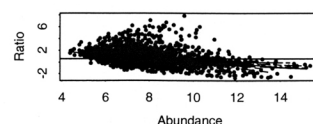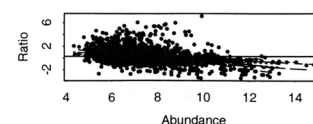

Supplement: pnas_98_23_13266__10.pdf [file pnas_98_23_13266__10.pdf]

# Kidney

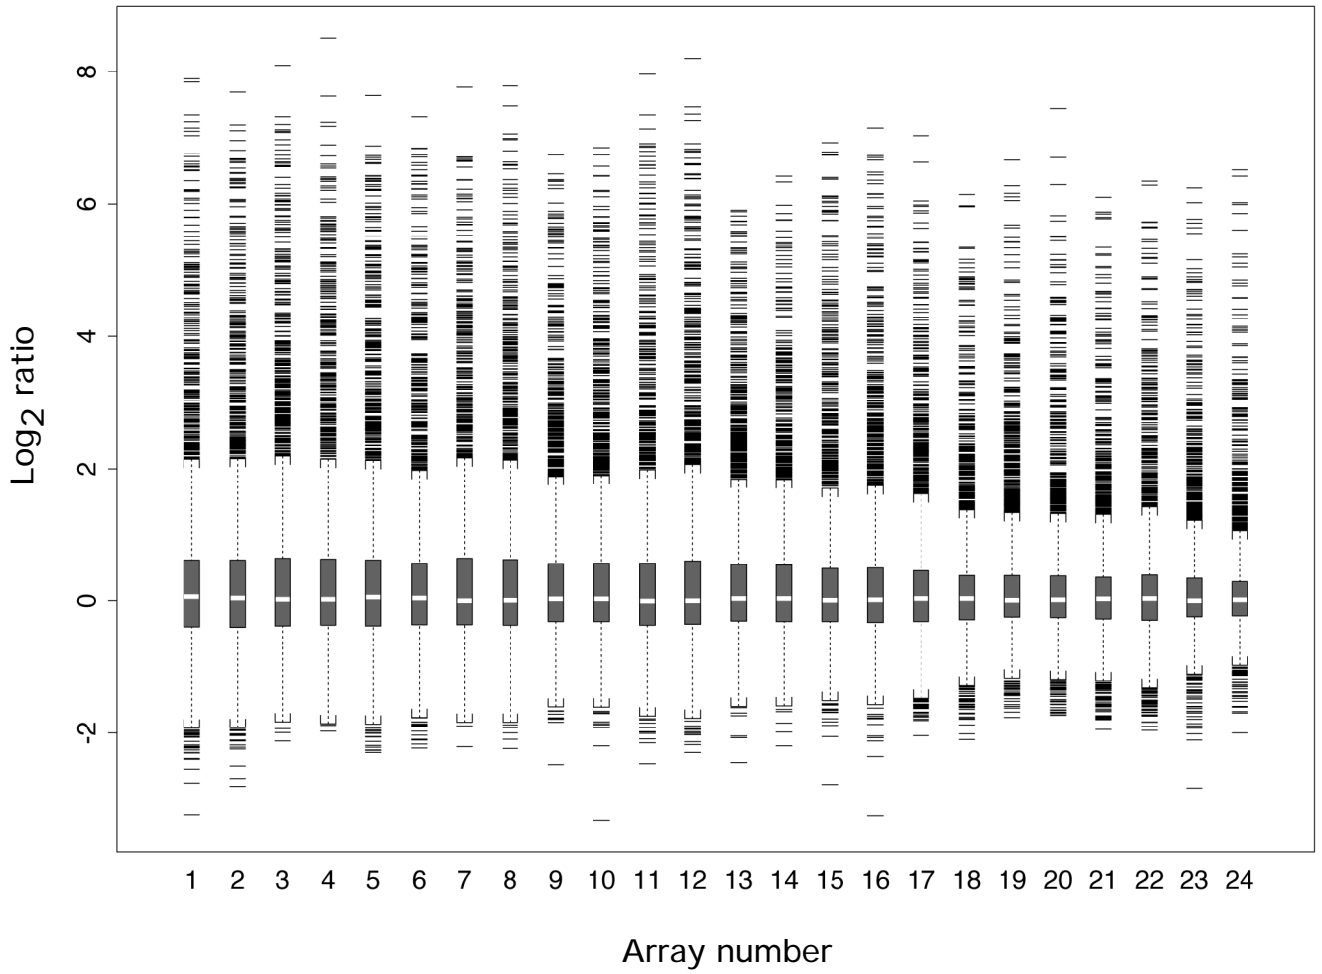

Supplement: pnas_98_23_13266__11.pdf [file pnas_98_23_13266__11.pdf]

# Liver

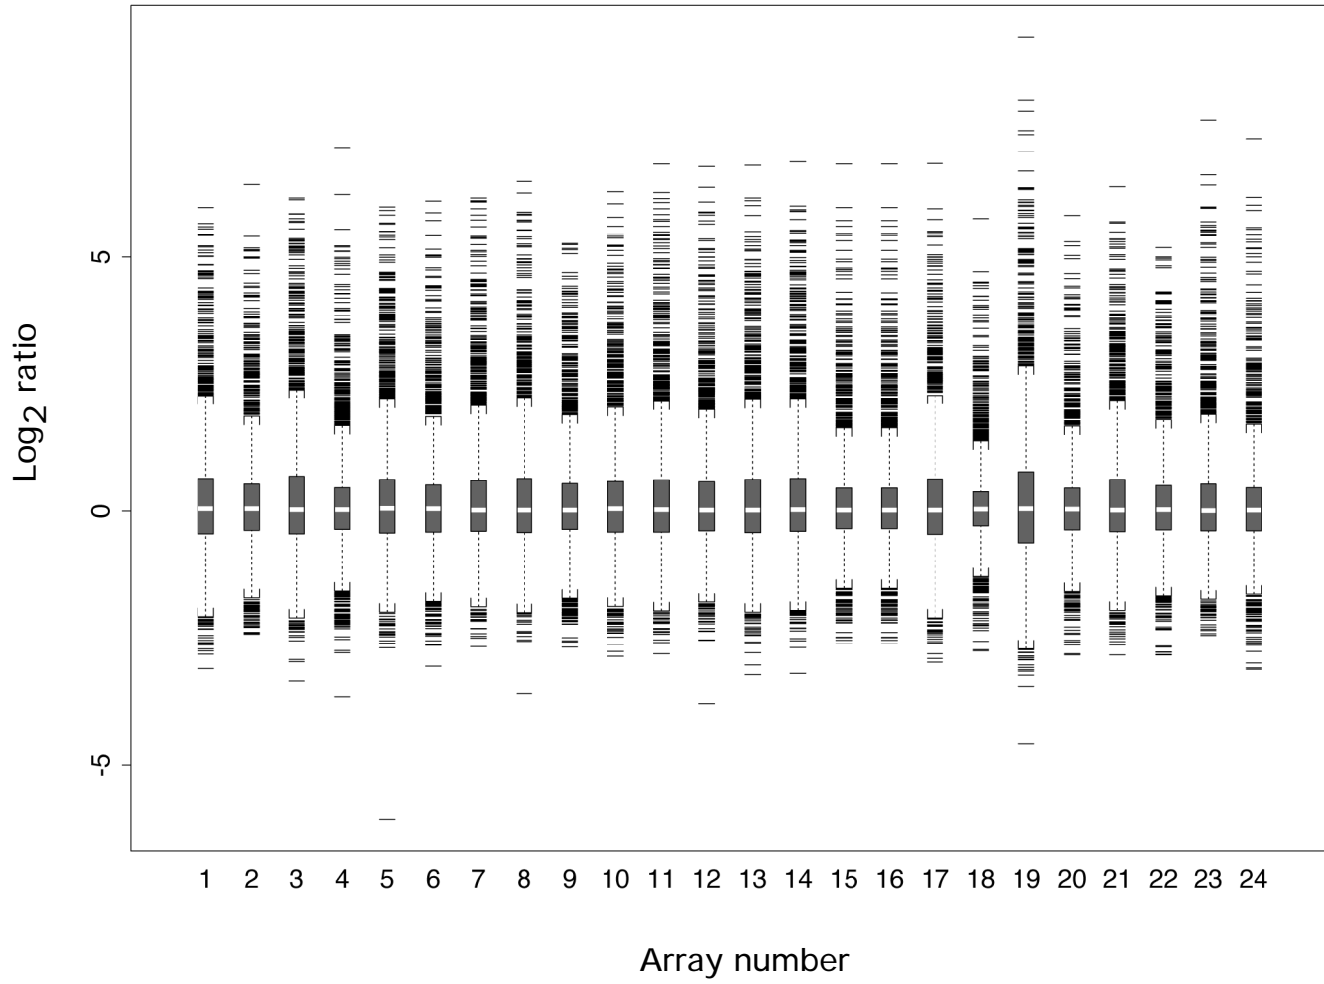

Supplement: pnas_98_23_13266__12.pdf [file pnas_98_23_13266__12.pdf]

# Testis

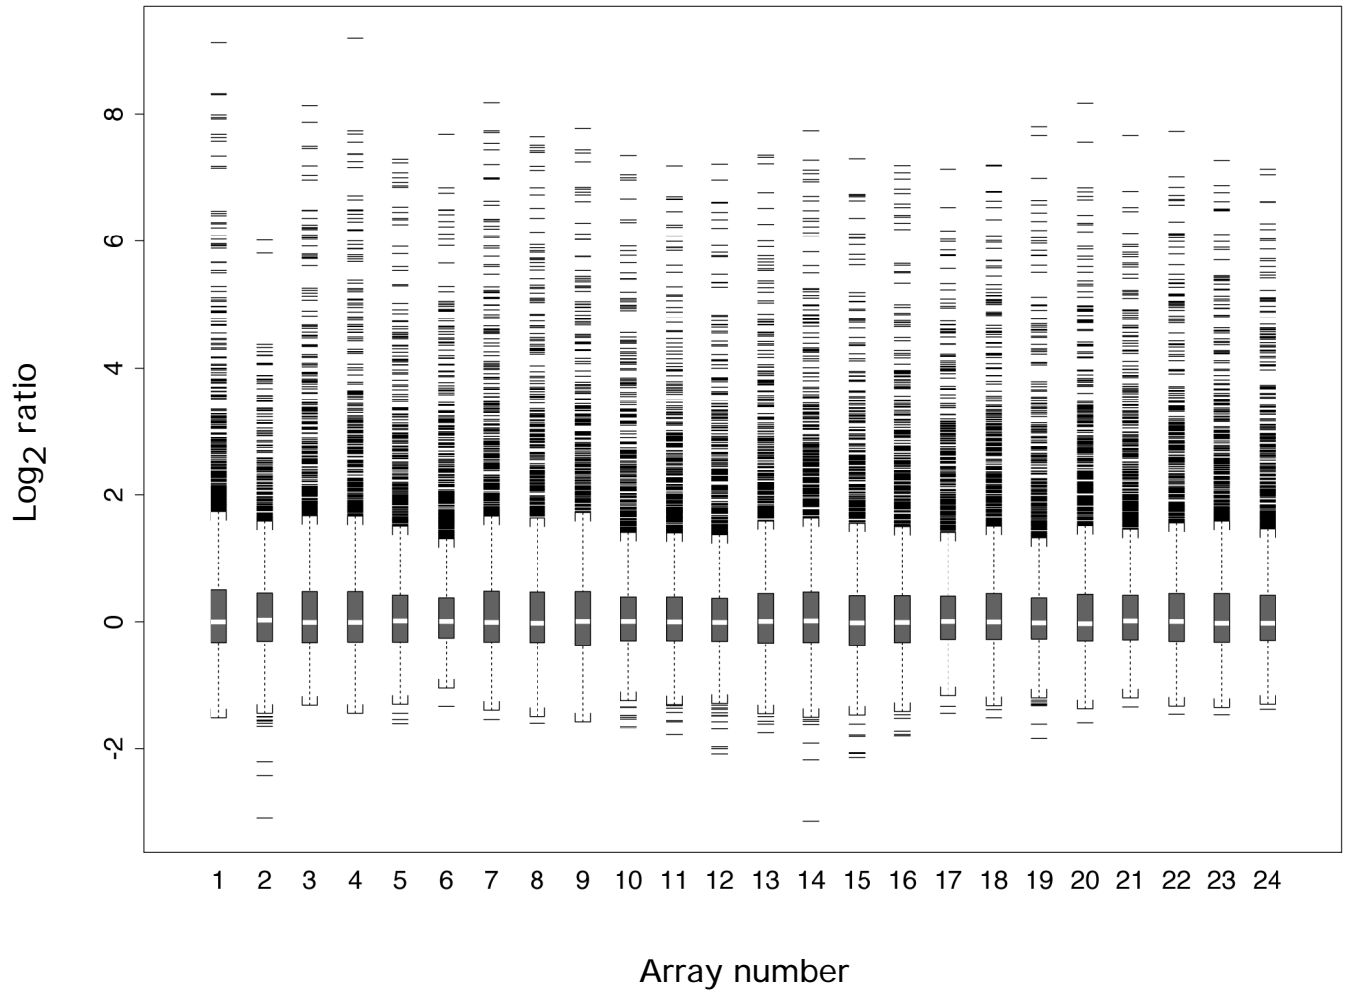

Supplement: pnas_98_23_13266__13.pdf [file pnas_98_23_13266__13.pdf]

# Kidney

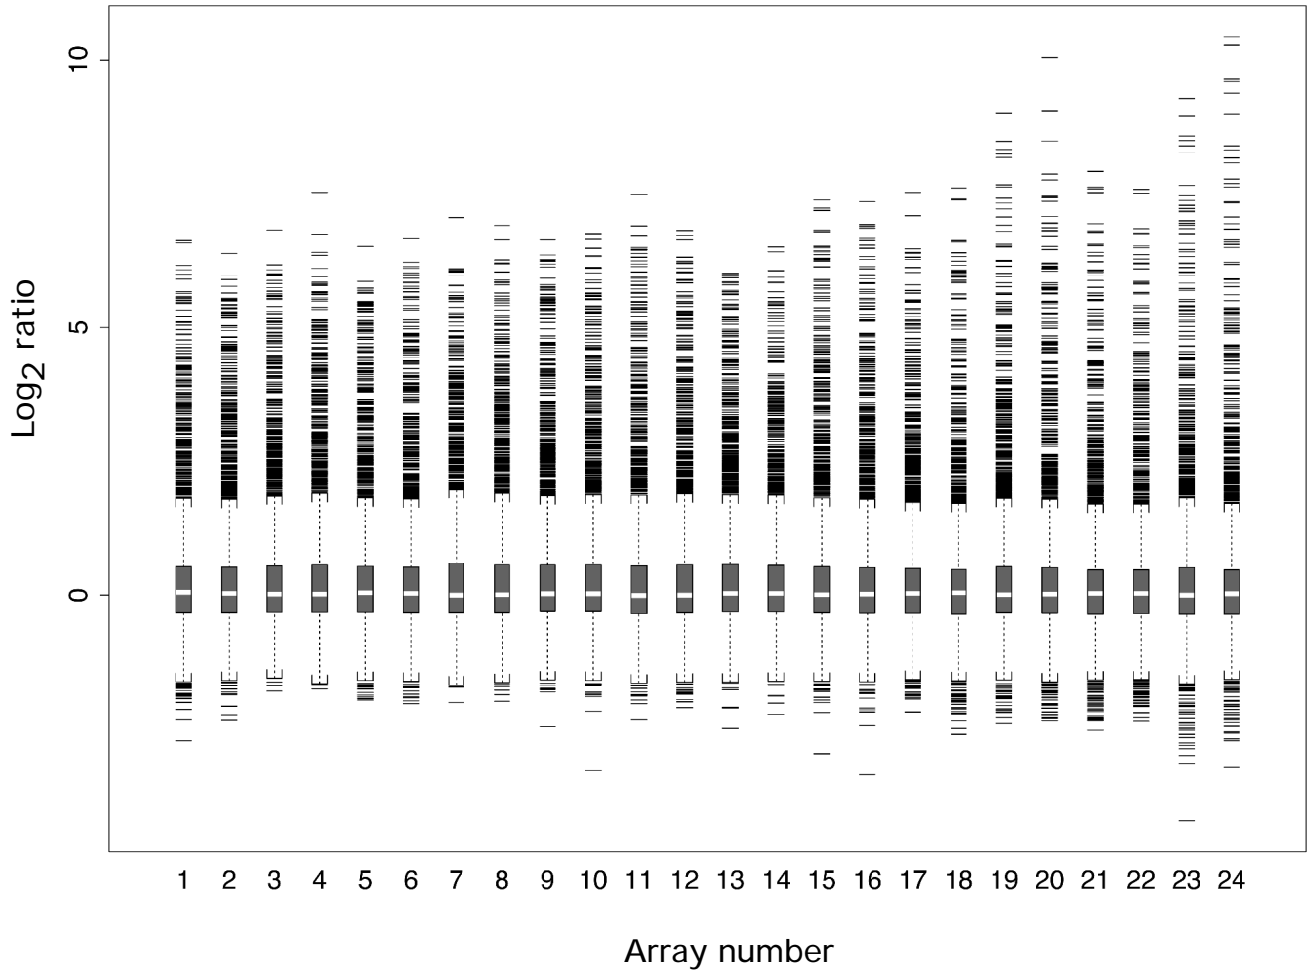

Supplement: pnas_98_23_13266__14.pdf [file pnas_98_23_13266__14.pdf]

# Liver

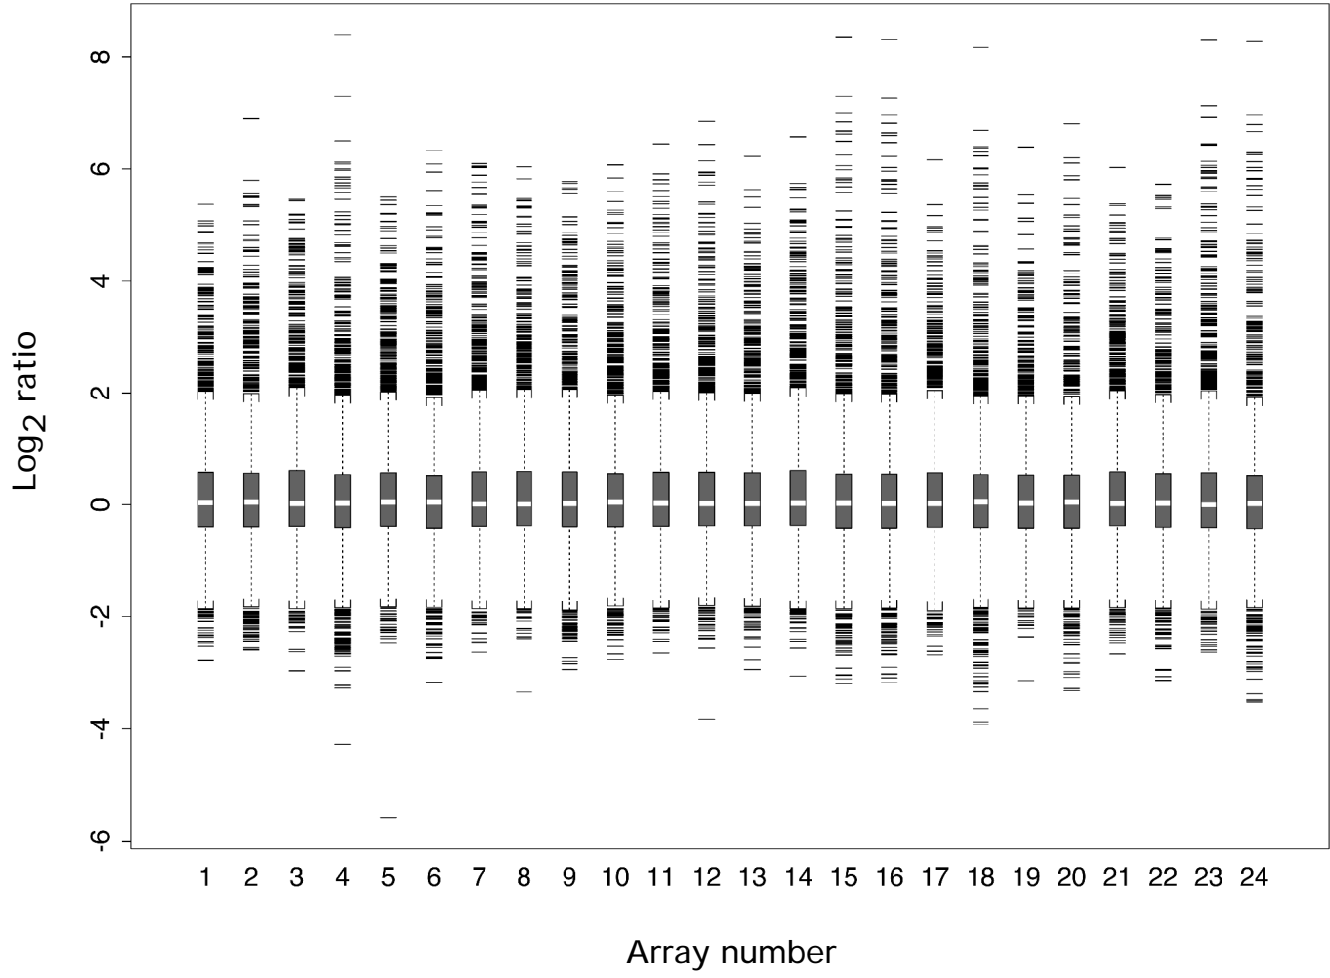

Supplement: pnas_98_23_13266__15.pdf [file pnas_98_23_13266__15.pdf]

# Testis

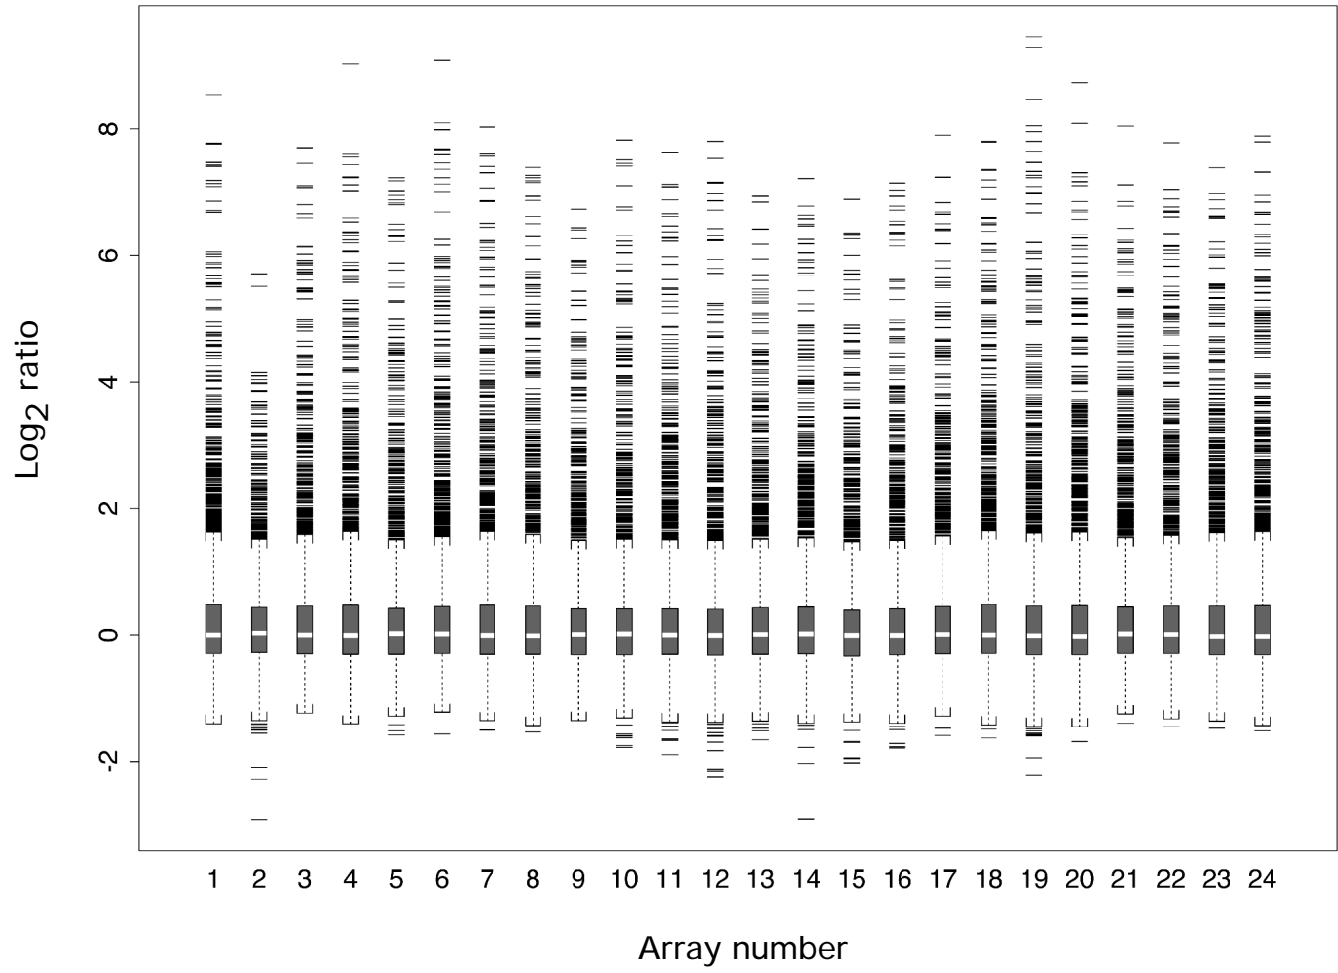

Supplement: pnas_98_23_13266__16.pdf [file pnas_98_23_13266__16.pdf]

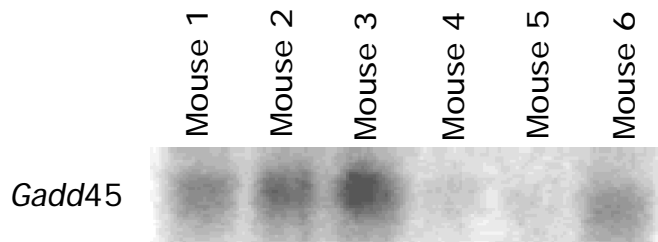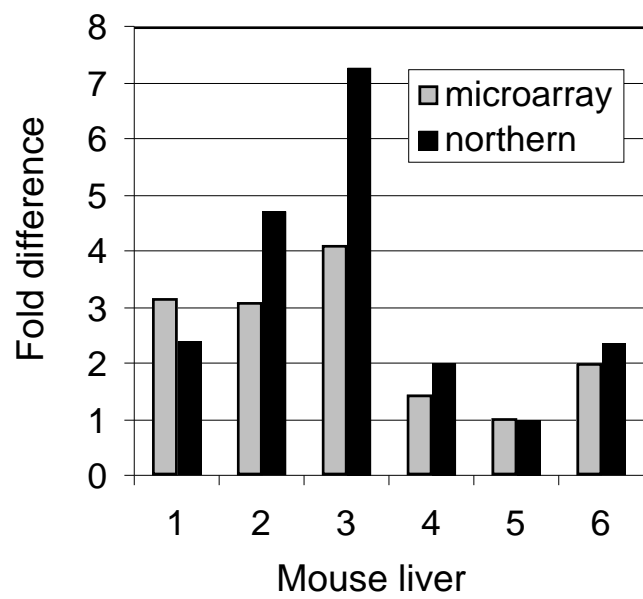

Supplement: pnas_98_23_13266__17.pdf [file pnas_98_23_13266__17.pdf]
